# Supplementary material for: MARK4 Inhibited by AChE Inhibitors, Donepezil and Rivastigmine Tartrate: Insights into Alzheimer’s Disease Therapy
Source: PubMed Central journal article supplement (PMC7277793; doi:10.3390/biom10050789), 2020-05-20
Supplement: biomolecules-10-00789-s001.pdf [file biomolecules-10-00789-s001.pdf]

Supplementary Materials

# MARK4 Inhibited by AChE Inhibitors, Donepezil and Rivastigmine Tartrate: Insights into Alzheimer's Disease Therapy

Anas Shamsi <sup>1</sup>, Saleha Anwar <sup>1</sup>, Taj Mohammad <sup>1</sup>, Mohamed F. Alajmi <sup>2</sup>, Afzal Hussain <sup>2</sup>, Md. Tabish Rehman <sup>2</sup>, Gulam Mustafa Hasan <sup>3</sup>, Asimul Islam <sup>1</sup> and Md. Imtaiyaz Hassan <sup>1,\*</sup>

<sup>1</sup> Centre for Interdisciplinary Research in Basic Sciences, Jamia Millia Islamia, Jamia Nagar, New Delhi 110025, India; anas.shamsi18@gmail.com (A.S.); email2saleha@gmail.com (S.A.); taj144796@st.jmi.ac.in (T.M.); aislam@jmi.ac.in (A.I.)

<sup>2</sup> Department of Pharmacognosy, College of Pharmacy, King Saud University, Riyadh, 11451 Saudi Arabia; malajmii@ksu.edu.sa (M.F.A.); afzal.hussain.amu@gmail.com (A.H.); m.tabish.rehman@gmail.com (M.T.R.)

<sup>3</sup> Department of Biochemistry, College of Medicine, Prince Sattam Bin Abdulaziz University, P.O. Box 173, Al-Kharj 11942, Saudi Arabia; mgulam@gmail.com

\* Correspondence: mi Hassan@jmi.ac.in; Tel.: +91-9990323217

Received: 23 April 2020; Accepted: 17 May 2020; Published: 20 May 2020

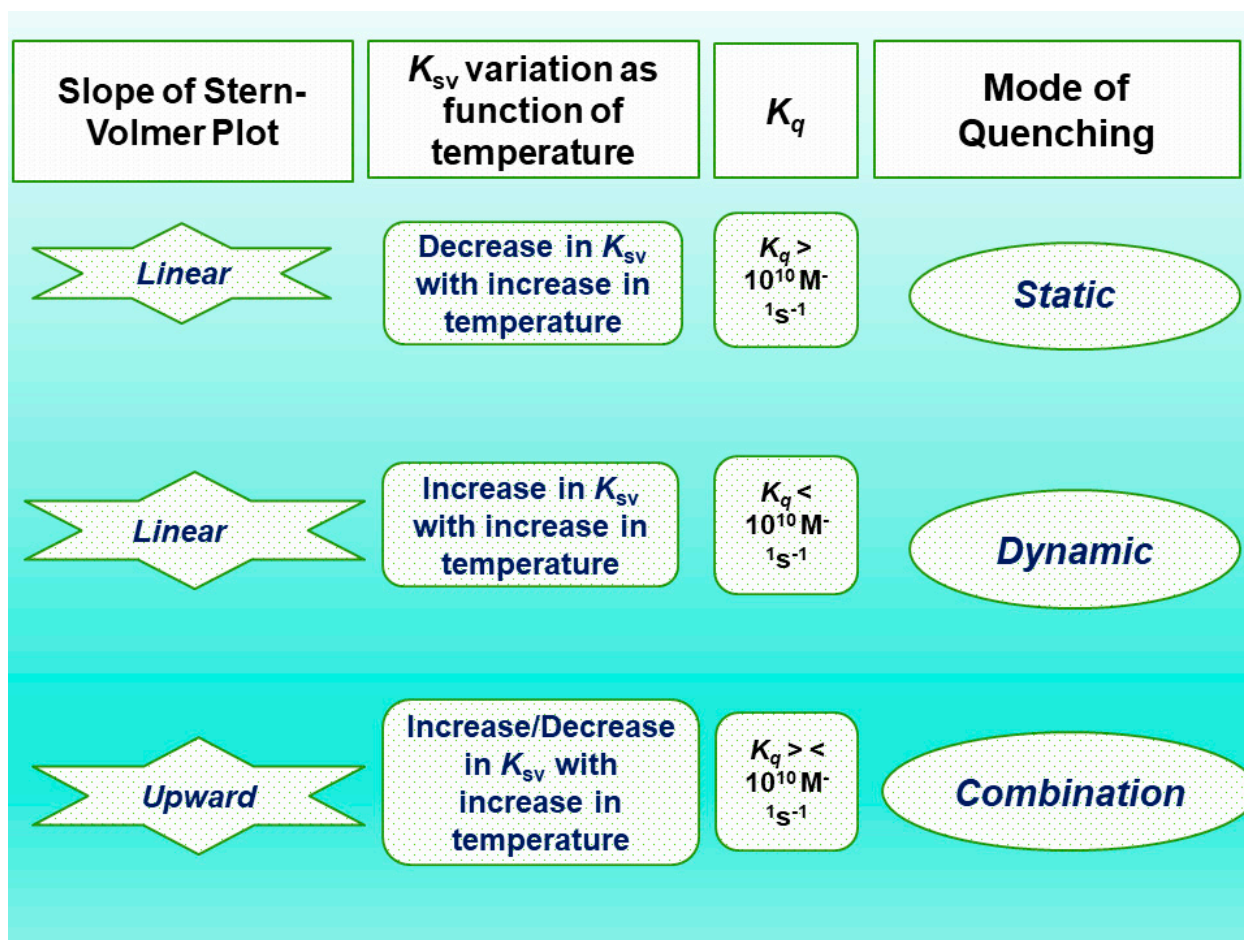

**Figure S1.** Graphical representation of the operative mode of quenching for specific protein-ligand interaction.

**Table S1.** Thermodynamic parameters obtained from ITC measurements.

| <b>MARK4-DP</b>                                                     |                                                         |                                            |
|---------------------------------------------------------------------|---------------------------------------------------------|--------------------------------------------|
| <b><math>K_a</math> (association constant), <math>M^{-1}</math></b> | <b><math>\Delta H</math> (enthalpy change), cal/mol</b> | <b><math>\Delta S</math> (cal/mol/deg)</b> |
| $K_{a1} = 6.79 \times 10^5 \pm 2.4 \times 10^5$                     | $\Delta H_1 = 8444 \pm 1.82 \times 10^3$                | $\Delta S_1 = 51.2$                        |
| $K_{a2} = 1. \times 10^5 \pm 1.9 \times 10^3$                       | $\Delta H_2 = -6.88 \times 10^4 \pm 5.48 \times 10^3$   | $\Delta S_2 = -207$                        |
| $K_{a3} = 9.37 \times 10^4 \pm 3.0 \times 10^3$                     | $\Delta H_3 = 1.01 \times 10^5 \pm 7.49 \times 10^3$    | $\Delta S_3 = 368$                         |
| $K_{a3} = -1.044 \times 10^5 \pm 4.68 \times 10^3 M$                | $\Delta H_4 = -4.91 \times 10^6 \pm 5.6 \times 10^6$    | $\Delta S_4 = -327$                        |
| <b>MARK4-RT</b>                                                     |                                                         |                                            |
| <b><math>K_a</math> (association constant), <math>M^{-1}</math></b> | <b><math>\Delta H</math> (enthalpy change), cal/mol</b> | <b><math>\Delta S</math> (cal/mol/deg)</b> |
| $K_{a1} = 1.02 \times 10^5 \pm 2.8 \times 10^5$                     | $\Delta H_1 = 1329 \pm 3.05 \times 10^3$                | $\Delta S_1 = 31.1$                        |
| $K_{a2} = 1.17 \times 10^5 \pm 7.3 \times 10^4$                     | $\Delta H_2 = -2.15 \times 10^5 \pm 9.07 \times 10^4$   | $\Delta S_2 = -700$                        |
| $K_{a3} = 2.00 \times 10^5 \pm 1.6 \times 10^5$                     | $\Delta H_3 = 7.86 \times 10^5 \pm 2.26 \times 10^5$    | $\Delta S_3 = 2.66 \times 10^3$            |
| $K_{a3} = 5.44 \times 10^4 \pm 2.54 \times 10$                      | $\Delta H_4 = 2.23 \times 10^6 \pm 4.8 \times 10^5$     | $\Delta S_4 = -7.47 \times 10^3$           |
